# Supplementary material for: Three main dimensions reflected by national SDG performance
Source: PubMed Central journal article supplement — Innovation (Camb). 2023 Sep 9;4(6):100507. doi: 10.1016/j.xinn.2023.100507 (PMC10514454; doi:10.1016/j.xinn.2023.100507), 2023-09-09
Supplement: mmc1.pdf [file mmc1.pdf]

**The Innovation, Volume 4**

## **Supplemental Information**

### **Three main dimensions reflected by national SDG performance**

**Xutong Wu, Bojie Fu, Shuai Wang, Yanxu Liu, Ying Yao, Yingjie Li, Zhenci Xu, and Jianguo Liu**

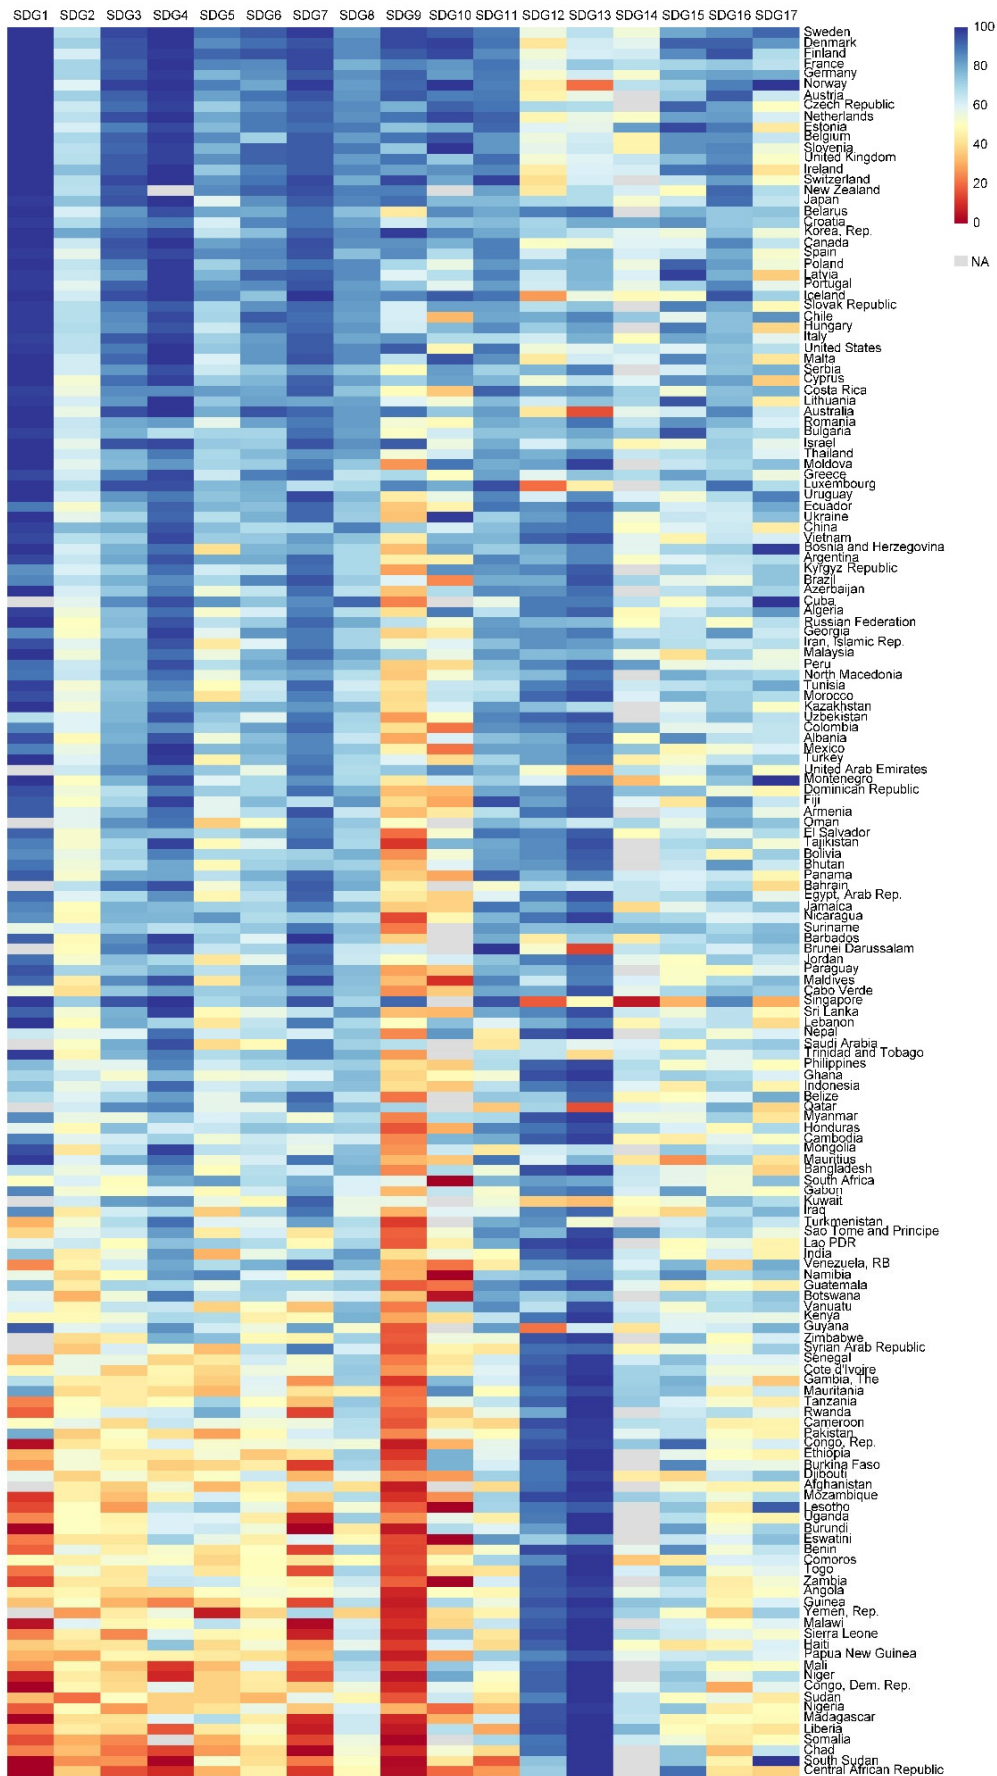

Fig. S1 SDG performances of 166 countries from the Sustainable Development Report 2020.

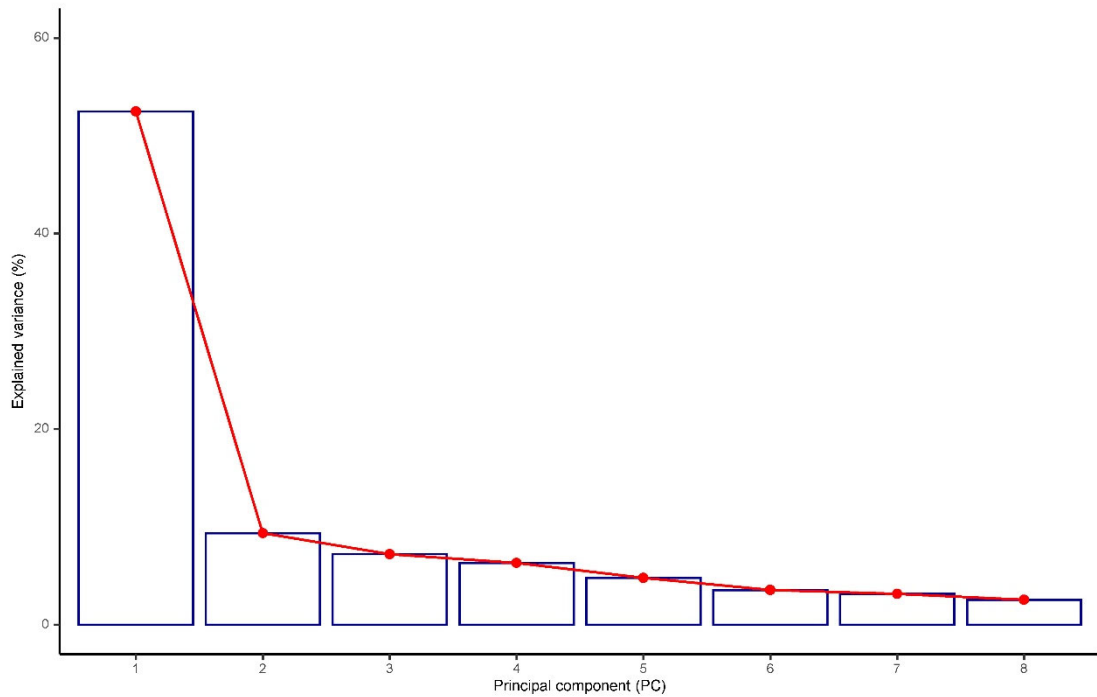

**Fig. S2 Explained variance for each principal component.**

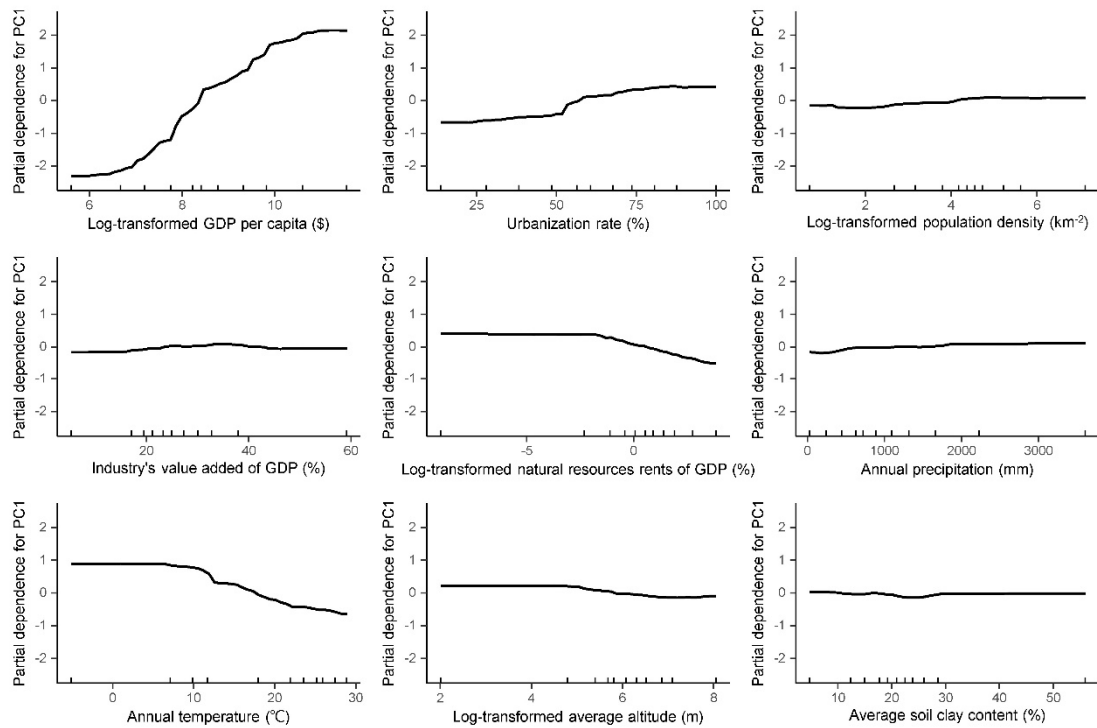

**Fig. S3 Partial dependence plots of the predictors for PC1.** The slopes of the partial dependence plots indicate the sensitivity of PC1 to the specific predictor. Tick marks in the x-axis represent the minimum, maximum, and deciles of the variable distribution.

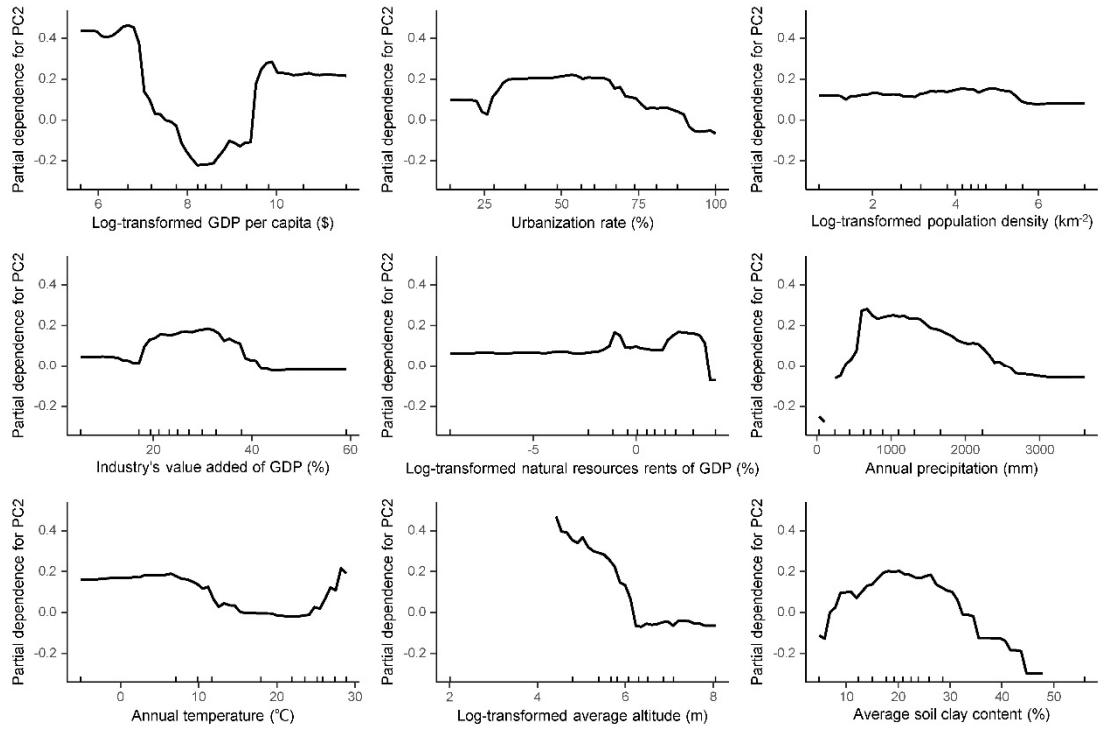

**Fig. S4 Partial dependence plots of the predictors for PC2.** The slopes of the partial dependence plot indicate the sensitivity of PC2 to the specific predictor. Tick marks in the x-axis represent the minimum, maximum, and deciles of the variable distribution.

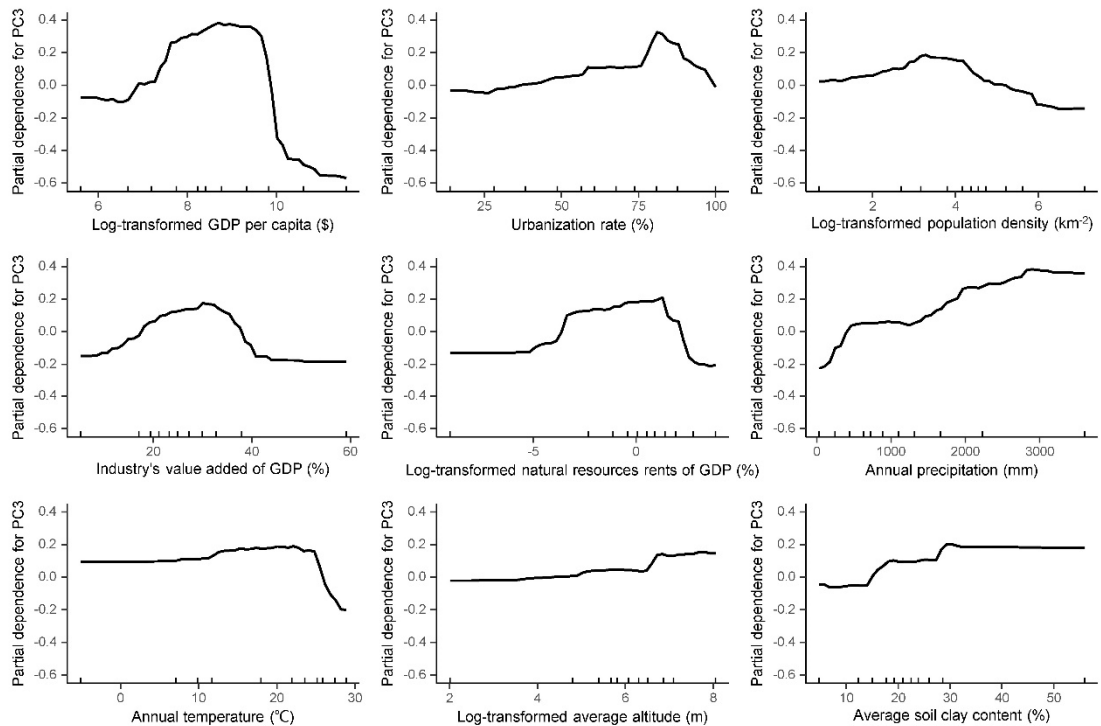

**Fig. S5 Partial dependence plots of the predictors for PC3.** The slopes of the partial dependence plot indicate the sensitivity of PC3 to the specific predictor. Tick marks in the x-axis represent the minimum, maximum, and deciles of the variable distribution.

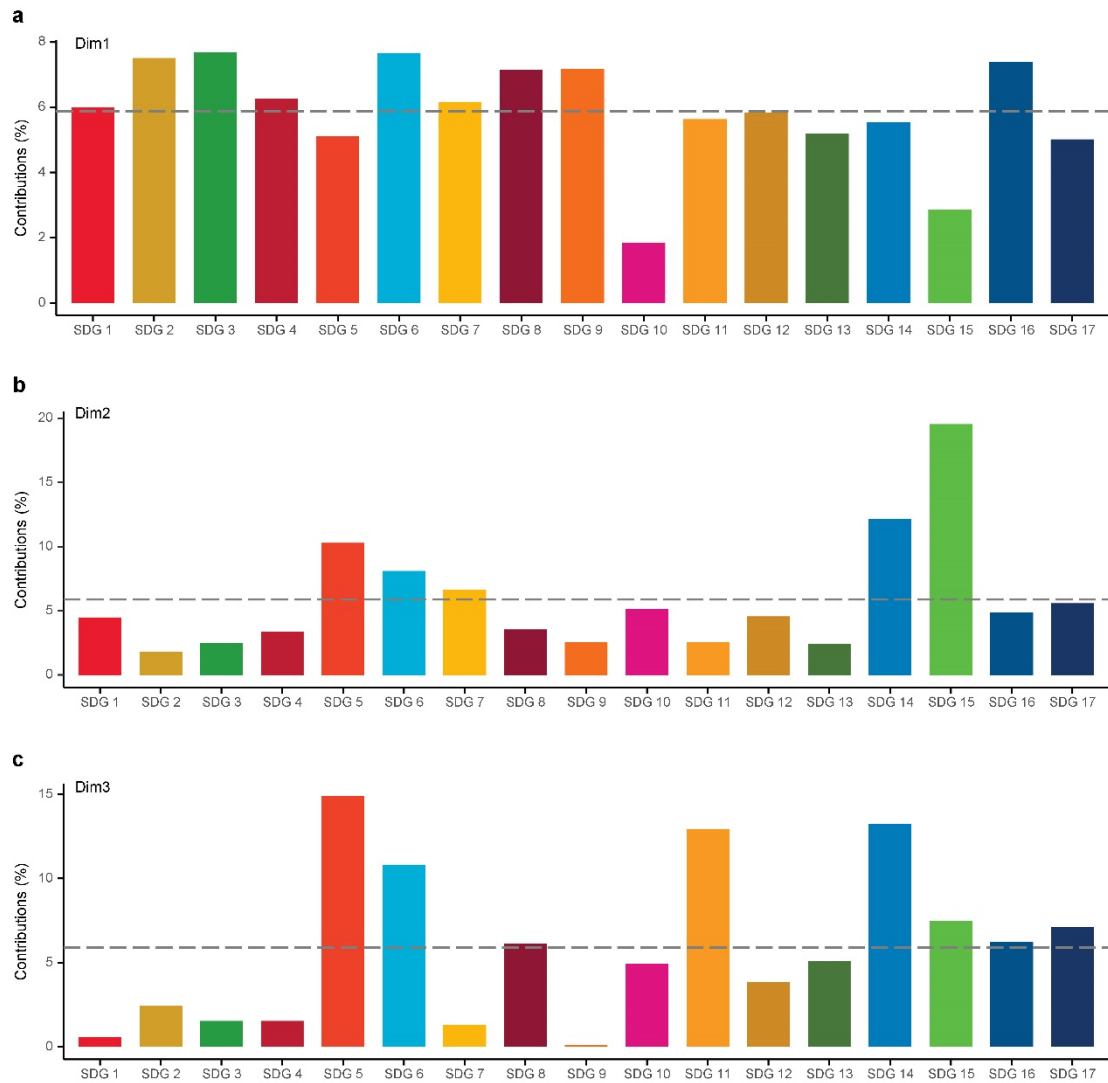

**Fig. S6 Contributions of each SDG to the three dimensions identified by SDR SDG indicator data.** Gray dashed line represents the average contribution of all SDGs.

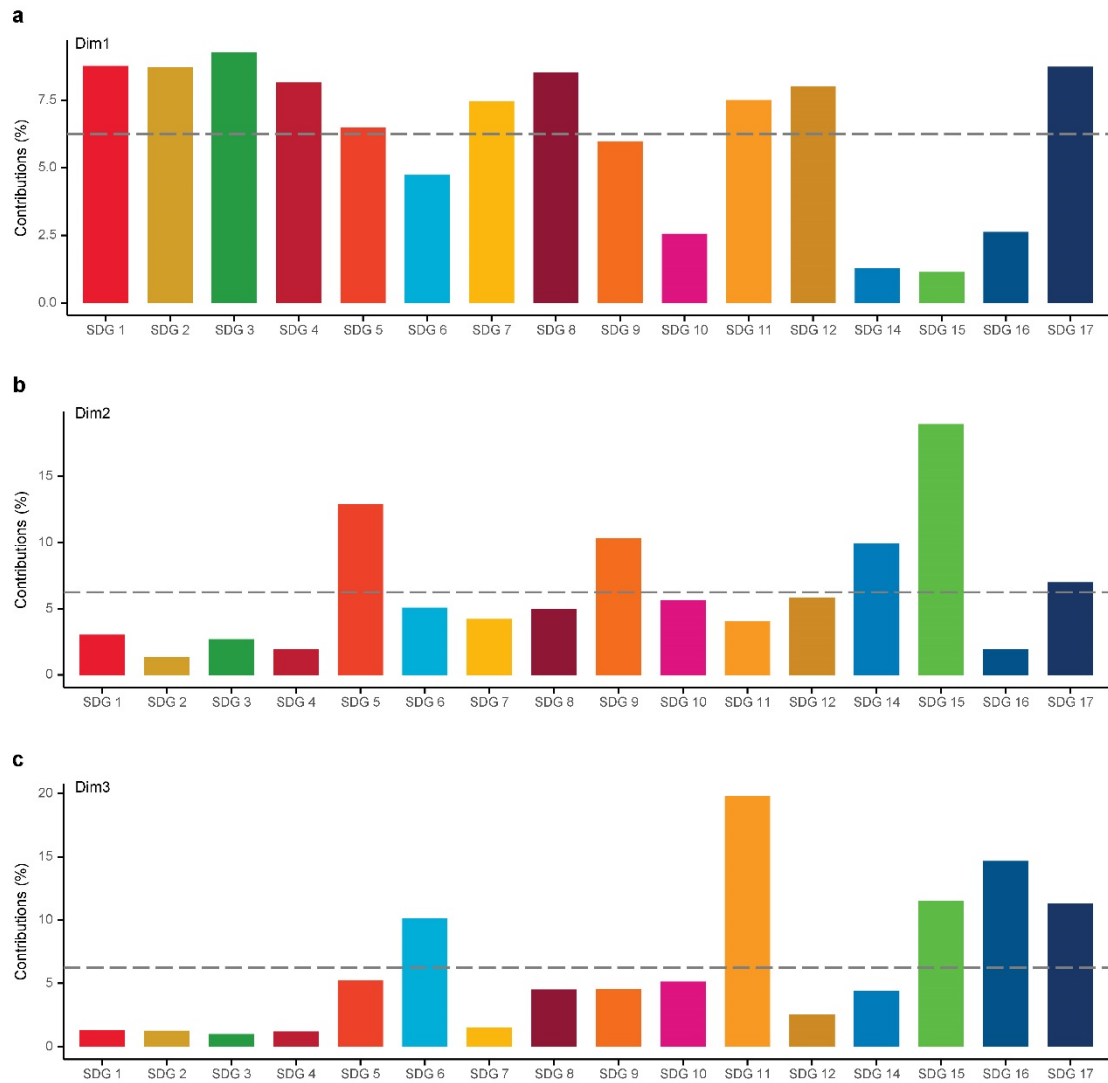

**Fig. S7 Contributions of each SDG to the three dimensions identified by United Nations' official SDG indicator data.** Gray dashed line represents the average contribution of all SDGs.

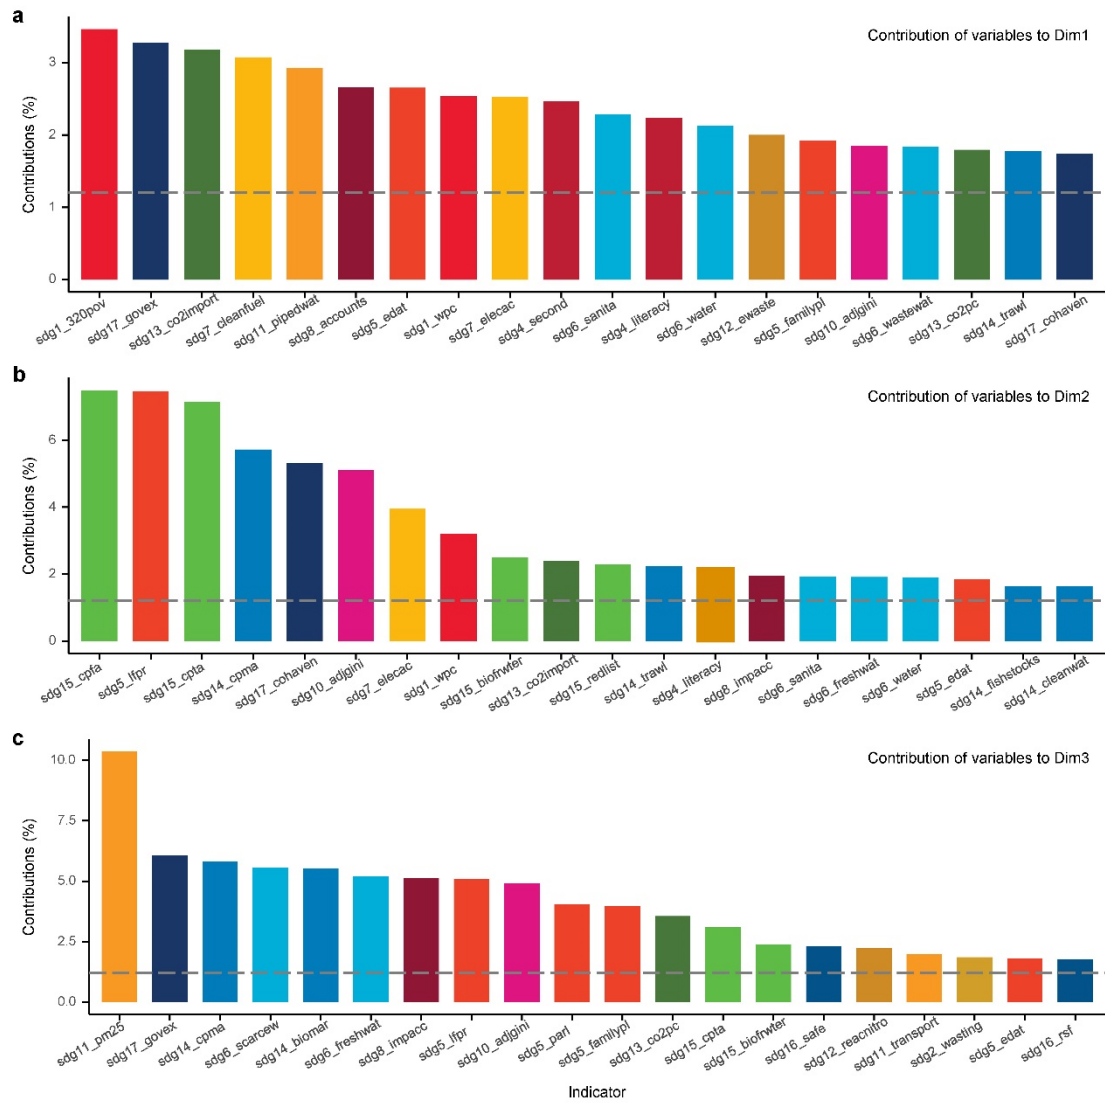

**Fig. S8 Contributions of the top 20 contributing indicators to the three dimensions identified by SDR SDG indicator data.** Gray dashed line represents the average contribution of all indicators.

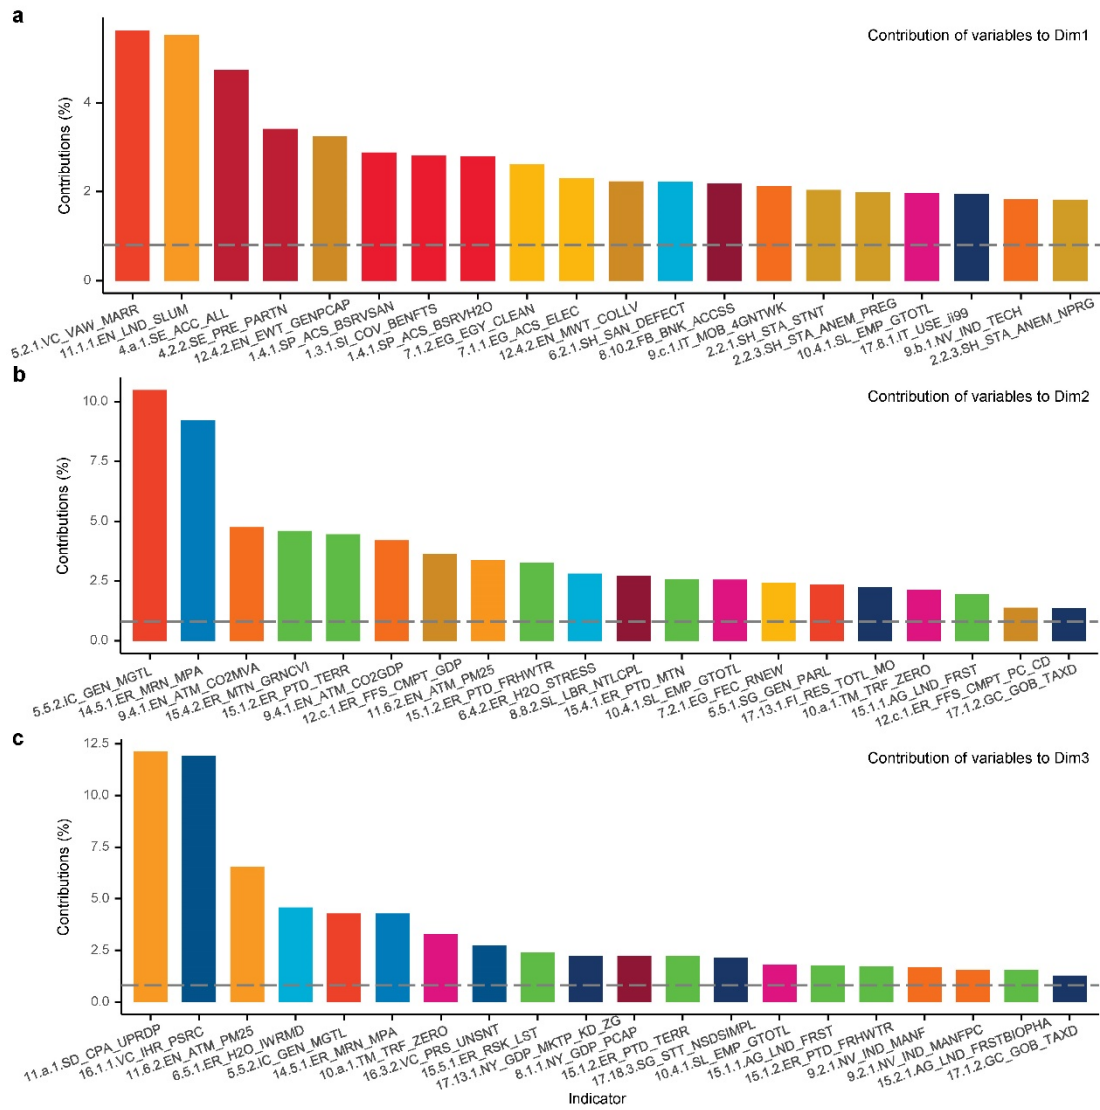

**Fig. S9 Contributions of the top 20 contributing indicators to the three dimensions identified by United Nations' official SDG indicator data. Gray dashed line represents the average contribution of all indicators.**



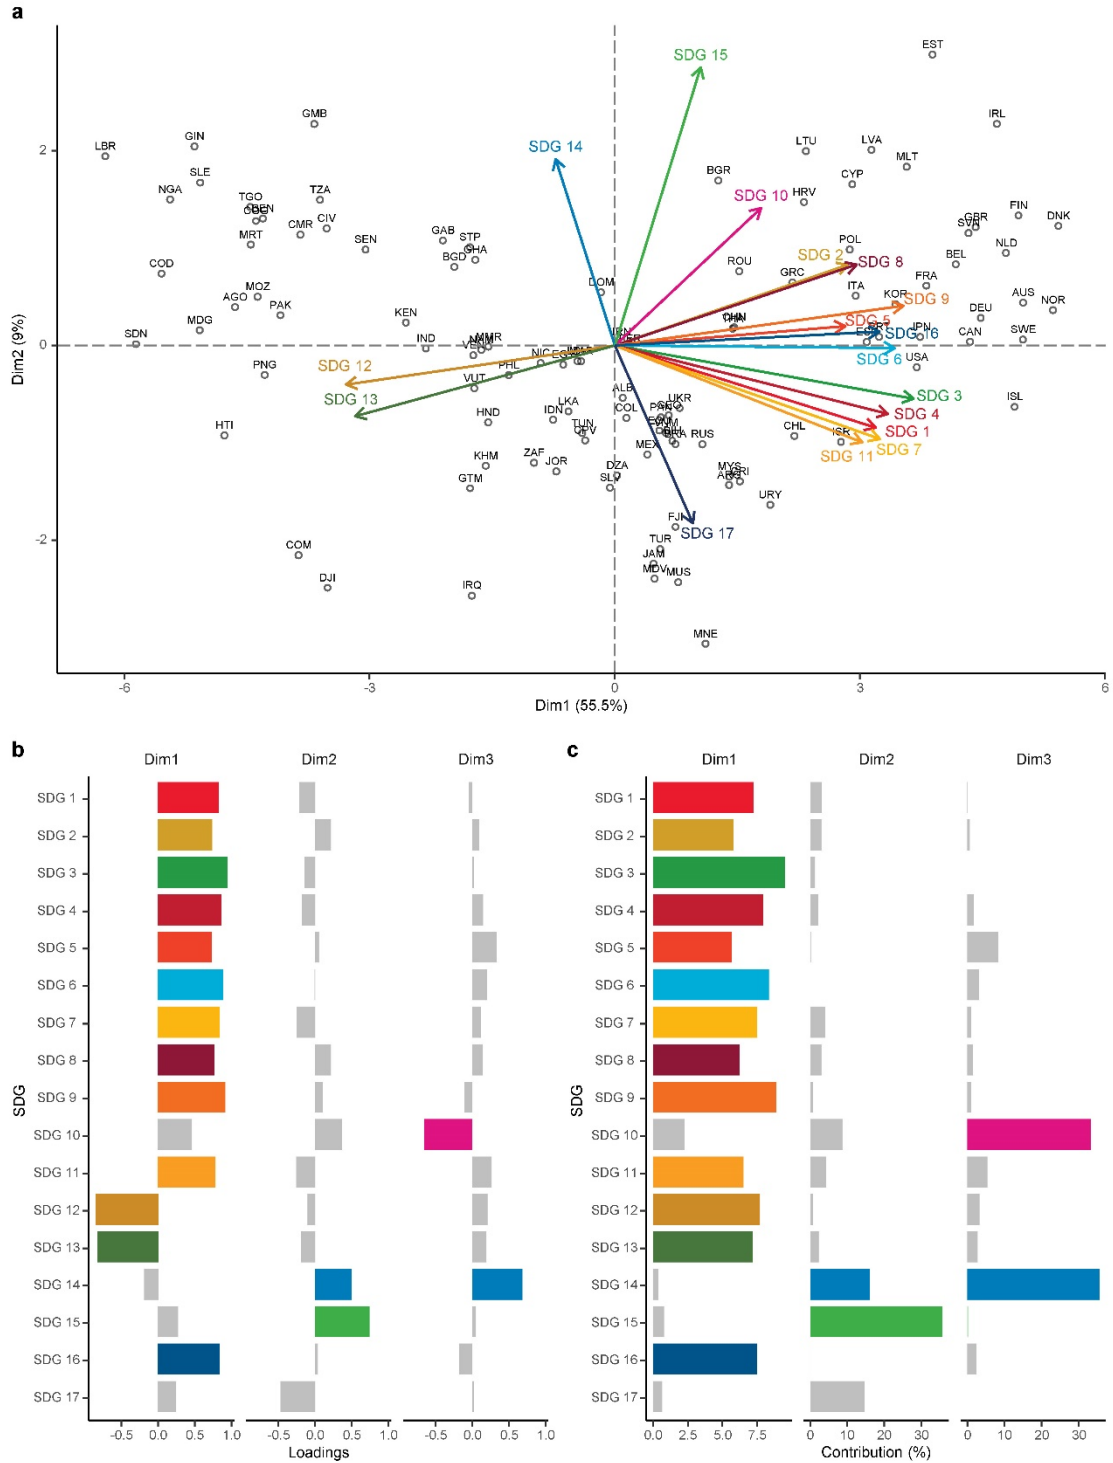

**Fig. S10 Main dimensions identified by non-imputed national SDG performances.** **a**, Biplot of PCA results. The full names and principal component values of the countries are shown in Table S1. **b**, Loading of each SDG to each dimension. **c**, Contribution of each SDG to each dimension. Non-gray bars indicate the SDGs with significant loadings (i.e., with an absolute value > 0.5).

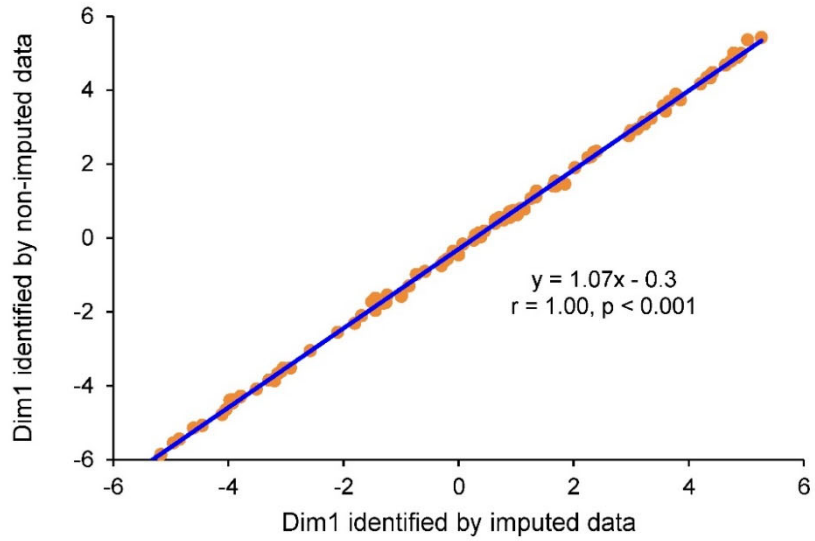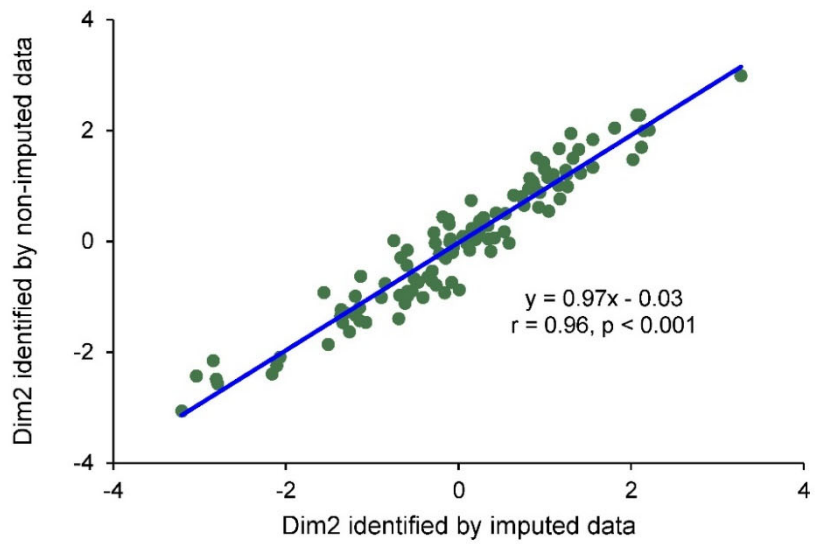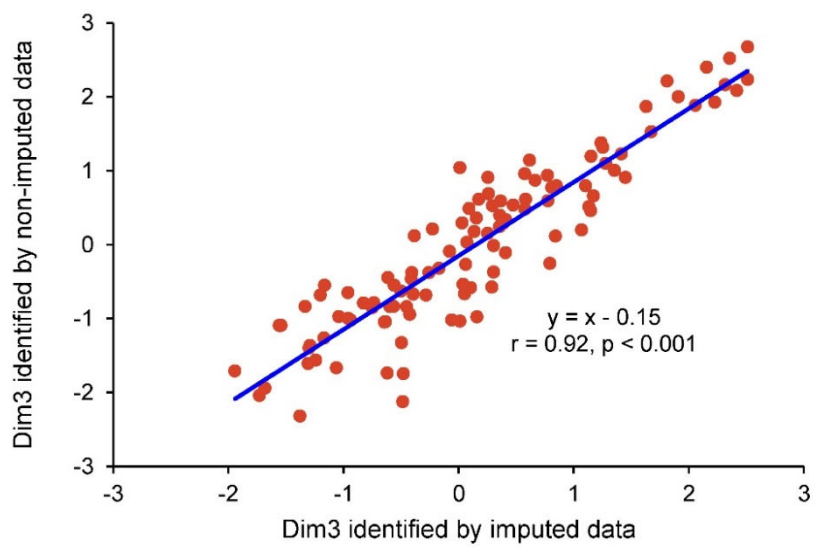

**Fig. S11 Comparisons between the dimensions identified by imputed SDR SDG data and non-imputed SDR SDG data.**

**Table S1 Principal component values of the analyzed countries.**

| Order | Abbreviation | Country name             | UN regional grouping             | PC1   | PC2   | PC3   |
|-------|--------------|--------------------------|----------------------------------|-------|-------|-------|
| 1     | AFG          | Afghanistan              | Central and Southern Asia        | -4.99 | -1.15 | -1.00 |
| 2     | AGO          | Angola                   | Sub-Saharan Africa               | -4.04 | -0.12 | -0.75 |
| 3     | ALB          | Albania                  | Europe and North America         | 0.38  | -0.31 | 0.10  |
| 4     | ARE          | United Arab Emirates     | Northern Africa and Western Asia | 2.71  | 0.20  | -2.18 |
| 5     | ARG          | Argentina                | Latin America and the Caribbean  | 1.65  | -1.15 | 1.13  |
| 6     | ARM          | Armenia                  | Northern Africa and Western Asia | 0.24  | -0.77 | 0.49  |
| 7     | AUS          | Australia                | Australia and New Zealand        | 4.78  | -0.18 | -1.56 |
| 8     | AUT          | Austria                  | Europe and North America         | 4.86  | 0.88  | -0.81 |
| 9     | AZE          | Azerbaijan               | Northern Africa and Western Asia | 0.72  | -0.52 | 0.33  |
| 10    | BDI          | Burundi                  | Sub-Saharan Africa               | -4.04 | 1.30  | -0.39 |
| 11    | BEL          | Belgium                  | Europe and North America         | 4.20  | 0.64  | -1.31 |
| 12    | BEN          | Benin                    | Sub-Saharan Africa               | -3.80 | 0.99  | -0.17 |
| 13    | BFA          | Burkina Faso             | Sub-Saharan Africa               | -3.72 | 2.53  | -0.95 |
| 14    | BGD          | Bangladesh               | Central and Southern Asia        | -1.45 | 0.73  | -0.08 |
| 15    | BGR          | Bulgaria                 | Europe and North America         | 1.35  | 2.12  | 0.66  |
| 16    | BHR          | Bahrain                  | Northern Africa and Western Asia | 1.42  | 0.60  | -1.08 |
| 17    | BIH          | Bosnia and Herzegovina   | Europe and North America         | 0.88  | -0.59 | 0.16  |
| 18    | BLR          | Belarus                  | Europe and North America         | 1.91  | 0.81  | 1.02  |
| 19    | BLZ          | Belize                   | Latin America and the Caribbean  | 0.00  | -2.14 | 0.51  |
| 20    | BOL          | Bolivia                  | Latin America and the Caribbean  | -0.07 | -0.19 | 1.43  |
| 21    | BRA          | Brazil                   | Latin America and the Caribbean  | 0.96  | -0.41 | 2.32  |
| 22    | BRB          | Barbados                 | Latin America and the Caribbean  | 1.84  | -1.87 | -0.70 |
| 23    | BRN          | Brunei Darussalam        | Eastern and Southeastern Asia    | 2.49  | -0.60 | -1.11 |
| 24    | BTN          | Bhutan                   | Central and Southern Asia        | 0.27  | -0.28 | 0.18  |
| 25    | BWA          | Botswana                 | Sub-Saharan Africa               | -1.08 | -1.30 | 1.04  |
| 26    | CAF          | Central African Republic | Sub-Saharan Africa               | -7.00 | 1.99  | -1.59 |
| 27    | CAN          | Canada                   | Europe and North America         | 4.31  | -0.10 | -0.56 |
| 28    | CHE          | Switzerland              | Europe and North America         | 4.72  | 0.31  | -0.76 |
| 29    | CHL          | Chile                    | Latin America and the Caribbean  | 2.30  | -0.16 | 2.42  |
| 30    | CHN          | China                    | Eastern and Southeastern Asia    | 1.84  | 0.24  | 0.30  |
| 31    | CIV          | Cote d'Ivoire            | Sub-Saharan Africa               | -3.05 | 1.10  | 0.15  |
| 32    | CMR          | Cameroon                 | Sub-Saharan Africa               | -3.30 | 0.82  | 0.03  |
| 33    | COD          | Congo, Dem. Rep.         | Sub-Saharan Africa               | -4.96 | 0.14  | -0.94 |
| 34    | COG          | Congo, Rep.              | Sub-Saharan Africa               | -3.98 | 1.24  | 0.57  |
| 35    | COL          | Colombia                 | Latin America and the Caribbean  | 0.36  | -0.08 | 2.51  |
| 36    | COM          | Comoros                  | Sub-Saharan Africa               | -3.20 | -2.85 | -1.38 |
| 37    | CPV          | Cabo Verde               | Sub-Saharan Africa               | -0.09 | -0.68 | 1.17  |
| 38    | CRI          | Costa Rica               | Latin America and the Caribbean  | 1.68  | -0.70 | 2.23  |
| 39    | CUB          | Cuba                     | Latin America and the Caribbean  | 1.02  | -0.53 | 2.15  |
| 40    | CYP          | Cyprus                   | Northern Africa and Western Asia | 2.99  | 1.39  | -1.33 |
| 41    | CZE          | Czech Republic           | Europe and North America         | 3.59  | 2.34  | -0.28 |
| 42    | DEU          | Germany                  | Europe and North America         | 4.42  | 0.34  | -0.45 |

| Order | Abbreviation | Country name       | UN regional grouping             | PC1   | PC2   | PC3   |
|-------|--------------|--------------------|----------------------------------|-------|-------|-------|
| 43    | DJI          | Djibouti           | Sub-Saharan Africa               | -2.92 | -2.81 | -0.06 |
| 44    | DNK          | Denmark            | Europe and North America         | 5.26  | 1.41  | -0.56 |
| 45    | DOM          | Dominican Republic | Latin America and the Caribbean  | 0.07  | 1.04  | 1.81  |
| 46    | DZA          | Algeria            | Northern Africa and Western Asia | 0.38  | -1.19 | -0.48 |
| 47    | ECU          | Ecuador            | Latin America and the Caribbean  | 0.70  | 0.01  | 2.51  |
| 48    | EGY          | Egypt, Arab Rep.   | Northern Africa and Western Asia | -0.25 | -0.07 | 0.41  |
| 49    | ESP          | Spain              | Europe and North America         | 3.23  | 0.20  | 0.13  |
| 50    | EST          | Estonia            | Europe and North America         | 3.78  | 3.27  | 0.01  |
| 51    | ETH          | Ethiopia           | Sub-Saharan Africa               | -3.64 | 1.03  | -0.76 |
| 52    | FIN          | Finland            | Europe and North America         | 4.85  | 1.55  | -0.41 |
| 53    | FJI          | Fiji               | Oceania                          | 1.04  | -1.51 | 1.45  |
| 54    | FRA          | France             | Europe and North America         | 3.83  | 0.93  | 0.36  |
| 55    | GAB          | Gabon              | Sub-Saharan Africa               | -1.69 | 0.86  | -0.83 |
| 56    | GBR          | United Kingdom     | Europe and North America         | 4.38  | 1.25  | -0.23 |
| 57    | GEO          | Georgia            | Northern Africa and Western Asia | 0.91  | -0.31 | 1.10  |
| 58    | GHA          | Ghana              | Sub-Saharan Africa               | -1.28 | 0.94  | 0.38  |
| 59    | GIN          | Guinea             | Sub-Saharan Africa               | -4.61 | 1.81  | -0.62 |
| 60    | GMB          | Gambia, The        | Sub-Saharan Africa               | -3.14 | 2.10  | -0.96 |
| 61    | GRC          | Greece             | Europe and North America         | 2.25  | 0.76  | 0.18  |
| 62    | GTM          | Guatemala          | Latin America and the Caribbean  | -1.31 | -1.34 | 1.28  |
| 63    | GUY          | Guyana             | Latin America and the Caribbean  | 0.66  | -2.79 | -1.66 |
| 64    | HND          | Honduras           | Latin America and the Caribbean  | -1.24 | -0.26 | 2.06  |
| 65    | HRV          | Croatia            | Europe and North America         | 2.35  | 2.02  | 0.77  |
| 66    | HTI          | Haiti              | Latin America and the Caribbean  | -4.11 | -1.56 | -1.06 |
| 67    | HUN          | Hungary            | Europe and North America         | 2.67  | 2.26  | 0.11  |
| 68    | IDN          | Indonesia          | Eastern and Southeastern Asia    | -0.30 | -0.85 | 0.58  |
| 69    | IND          | India              | Central and Southern Asia        | -1.81 | -0.27 | -0.50 |
| 70    | IRL          | Ireland            | Europe and North America         | 4.63  | 2.07  | -1.17 |
| 71    | IRN          | Iran, Islamic Rep. | Central and Southern Asia        | 0.29  | 0.35  | 0.47  |
| 72    | IRQ          | Iraq               | Northern Africa and Western Asia | -1.26 | -2.79 | -0.62 |
| 73    | ISL          | Iceland            | Europe and North America         | 4.85  | -1.14 | -1.68 |
| 74    | ISR          | Israel             | Northern Africa and Western Asia | 2.96  | -1.20 | -0.40 |
| 75    | ITA          | Italy              | Europe and North America         | 3.10  | 0.43  | -0.59 |
| 76    | JAM          | Jamaica            | Latin America and the Caribbean  | 0.77  | -2.11 | 0.79  |
| 77    | JOR          | Jordan             | Northern Africa and Western Asia | -0.30 | -1.32 | -0.43 |
| 78    | JPN          | Japan              | Eastern and Southeastern Asia    | 3.86  | 0.05  | -0.65 |
| 79    | KAZ          | Kazakhstan         | Central and Southern Asia        | 1.67  | -0.30 | 0.17  |
| 80    | KEN          | Kenya              | Sub-Saharan Africa               | -2.10 | 0.16  | 0.58  |
| 81    | KGZ          | Kyrgyz Republic    | Central and Southern Asia        | 0.50  | 0.09  | 0.53  |
| 82    | KHM          | Cambodia           | Eastern and Southeastern Asia    | -1.00 | -1.36 | -0.50 |
| 83    | KOR          | Korea, Rep.        | Eastern and Southeastern Asia    | 3.60  | 0.29  | -0.74 |
| 84    | KWT          | Kuwait             | Northern Africa and Western Asia | 1.41  | -1.90 | -2.83 |
| 85    | LAO          | Lao PDR            | Eastern and Southeastern Asia    | -1.36 | -0.04 | 1.15  |

| <b>Order</b> | <b>Abbreviation</b> | <b>Country name</b> | <b>UN regional grouping</b>      | <b>PC1</b> | <b>PC2</b> | <b>PC3</b> |
|--------------|---------------------|---------------------|----------------------------------|------------|------------|------------|
| 86           | LBN                 | Lebanon             | Northern Africa and Western Asia | 0.00       | -0.59      | -1.73      |
| 87           | LBR                 | Liberia             | Sub-Saharan Africa               | -5.52      | 1.30       | -1.20      |
| 88           | LKA                 | Sri Lanka           | Central and Southern Asia        | -0.19      | -0.51      | 0.85       |
| 89           | LSO                 | Lesotho             | Sub-Saharan Africa               | -3.74      | -0.73      | 1.89       |
| 90           | LTU                 | Lithuania           | Europe and North America         | 2.39       | 2.15       | 0.25       |
| 91           | LUX                 | Luxembourg          | Europe and North America         | 4.37       | -0.29      | -1.87      |
| 92           | LVA                 | Latvia              | Europe and North America         | 3.22       | 2.21       | 0.09       |
| 93           | MAR                 | Morocco             | Northern Africa and Western Asia | -0.07      | 0.13       | 0.04       |
| 94           | MDA                 | Moldova             | Europe and North America         | 0.94       | -0.09      | 0.59       |
| 95           | MDG                 | Madagascar          | Sub-Saharan Africa               | -4.46      | -0.28      | 0.29       |
| 96           | MDV                 | Maldives            | Central and Southern Asia        | 0.64       | -2.16      | 1.35       |
| 97           | MEX                 | Mexico              | Latin America and the Caribbean  | 0.63       | -0.62      | 2.36       |
| 98           | MKD                 | North Macedonia     | Europe and North America         | 0.81       | 0.33       | 0.52       |
| 99           | MLI                 | Mali                | Sub-Saharan Africa               | -4.46      | 1.82       | -0.96      |
| 100          | MLT                 | Malta               | Europe and North America         | 3.56       | 1.55       | -1.54      |
| 101          | MMR                 | Myanmar             | Eastern and Southeastern Asia    | -0.99      | -0.10      | -0.29      |
| 102          | MNE                 | Montenegro          | Europe and North America         | 1.34       | -3.21      | -0.49      |
| 103          | MNG                 | Mongolia            | Eastern and Southeastern Asia    | -0.10      | 0.31       | -0.88      |
| 104          | MOZ                 | Mozambique          | Sub-Saharan Africa               | -3.93      | 0.54       | 1.24       |
| 105          | MRT                 | Mauritania          | Sub-Saharan Africa               | -3.95      | 0.87       | -1.29      |
| 106          | MUS                 | Mauritius           | Sub-Saharan Africa               | 1.14       | -3.04      | -0.60      |
| 107          | MWI                 | Malawi              | Sub-Saharan Africa               | -3.83      | 0.74       | 0.53       |
| 108          | MYS                 | Malaysia            | Eastern and Southeastern Asia    | 1.69       | -1.37      | 0.06       |
| 109          | NAM                 | Namibia             | Sub-Saharan Africa               | -1.45      | 0.10       | 1.63       |
| 110          | NER                 | Niger               | Sub-Saharan Africa               | -5.06      | 1.69       | -1.21      |
| 111          | NGA                 | Nigeria             | Sub-Saharan Africa               | -4.85      | 0.91       | -0.39      |
| 112          | NIC                 | Nicaragua           | Latin America and the Caribbean  | -0.58      | 0.37       | 1.67       |
| 113          | NLD                 | Netherlands         | Europe and North America         | 4.73       | 0.81       | -1.17      |
| 114          | NOR                 | Norway              | Europe and North America         | 5.02       | 0.24       | -0.96      |
| 115          | NPL                 | Nepal               | Central and Southern Asia        | -1.24      | 1.16       | 0.16       |
| 116          | NZL                 | New Zealand         | Australia and New Zealand        | 4.59       | -0.39      | 0.06       |
| 117          | OMN                 | Oman                | Northern Africa and Western Asia | 0.77       | -0.58      | -0.51      |
| 118          | PAK                 | Pakistan            | Central and Southern Asia        | -3.51      | -0.11      | -1.30      |
| 119          | PAN                 | Panama              | Latin America and the Caribbean  | 0.82       | -0.47      | 1.25       |
| 120          | PER                 | Peru                | Latin America and the Caribbean  | 0.45       | 0.59       | 2.15       |
| 121          | PHL                 | Philippines         | Eastern and Southeastern Asia    | -0.86      | -0.15      | 1.15       |
| 122          | PNG                 | Papua New Guinea    | Oceania                          | -3.79      | -0.67      | -0.26      |
| 123          | POL                 | Poland              | Europe and North America         | 2.99       | 1.26       | 0.36       |
| 124          | PRT                 | Portugal            | Europe and North America         | 3.34       | 0.23       | 0.25       |
| 125          | PRY                 | Paraguay            | Latin America and the Caribbean  | 0.52       | -0.88      | 1.21       |
| 126          | QAT                 | Qatar               | Northern Africa and Western Asia | 1.63       | 0.25       | -2.97      |
| 127          | ROU                 | Romania             | Europe and North America         | 1.69       | 1.17       | 0.81       |
| 128          | RUS                 | Russian Federation  | Europe and North America         | 1.26       | -0.90      | 0.41       |

| <b>Order</b> | <b>Abbreviation</b> | <b>Country name</b>   | <b>UN regional grouping</b>      | <b>PC1</b> | <b>PC2</b> | <b>PC3</b> |
|--------------|---------------------|-----------------------|----------------------------------|------------|------------|------------|
| 129          | RWA                 | Rwanda                | Sub-Saharan Africa               | -2.37      | 0.67       | 0.44       |
| 130          | SAU                 | Saudi Arabia          | Northern Africa and Western Asia | 0.17       | -1.49      | -1.54      |
| 131          | SDN                 | Sudan                 | Northern Africa and Western Asia | -5.18      | -0.75      | -1.94      |
| 132          | SEN                 | Senegal               | Sub-Saharan Africa               | -2.58      | 0.88       | 0.07       |
| 133          | SGP                 | Singapore             | Eastern and Southeastern Asia    | 4.65       | -4.27      | -3.57      |
| 134          | SLE                 | Sierra Leone          | Sub-Saharan Africa               | -4.46      | 1.17       | -1.04      |
| 135          | SLV                 | El Salvador           | Latin America and the Caribbean  | 0.26       | -1.07      | 1.07       |
| 136          | SOM                 | Somalia               | Sub-Saharan Africa               | -5.65      | -0.67      | -0.57      |
| 137          | SRB                 | Serbia                | Europe and North America         | 1.60       | -0.37      | 0.14       |
| 138          | SSD                 | South Sudan           | Sub-Saharan Africa               | -6.54      | -0.06      | -1.00      |
| 139          | STP                 | Sao Tome and Principe | Sub-Saharan Africa               | -1.45      | 1.16       | 0.62       |
| 140          | SUR                 | Suriname              | Latin America and the Caribbean  | 0.52       | 1.32       | 0.98       |
| 141          | SVK                 | Slovak Republic       | Europe and North America         | 2.96       | 2.00       | -0.19      |
| 142          | SVN                 | Slovenia              | Europe and North America         | 4.37       | 1.03       | -1.24      |
| 143          | SWE                 | Sweden                | Europe and North America         | 4.90       | 0.42       | 0.05       |
| 144          | SWZ                 | Eswatini              | Sub-Saharan Africa               | -2.97      | -1.95      | 0.52       |
| 145          | SYR                 | Syrian Arab Republic  | Northern Africa and Western Asia | -2.84      | -1.96      | -0.71      |
| 146          | TCD                 | Chad                  | Sub-Saharan Africa               | -6.77      | 0.91       | -1.28      |
| 147          | TGO                 | Togo                  | Sub-Saharan Africa               | -3.93      | 0.99       | -0.41      |
| 148          | THA                 | Thailand              | Eastern and Southeastern Asia    | 1.66       | 0.53       | 0.77       |
| 149          | TJK                 | Tajikistan            | Central and Southern Asia        | -0.15      | 0.06       | -0.07      |
| 150          | TKM                 | Turkmenistan          | Central and Southern Asia        | -0.28      | -0.54      | -0.29      |
| 151          | TTO                 | Trinidad and Tobago   | Latin America and the Caribbean  | 1.24       | -0.15      | -0.51      |
| 152          | TUN                 | Tunisia               | Northern Africa and Western Asia | -0.10      | -0.59      | 0.30       |
| 153          | TUR                 | Turkey                | Northern Africa and Western Asia | 0.89       | -2.07      | 0.29       |
| 154          | TZA                 | Tanzania              | Sub-Saharan Africa               | -3.08      | 1.32       | 0.26       |
| 155          | UGA                 | Uganda                | Sub-Saharan Africa               | -3.70      | 1.58       | -0.50      |
| 156          | UKR                 | Ukraine               | Europe and North America         | 1.08       | -0.35      | 0.01       |
| 157          | URY                 | Uruguay               | Latin America and the Caribbean  | 2.02       | -1.26      | 1.15       |
| 158          | USA                 | United States         | Europe and North America         | 3.66       | -0.22      | 0.36       |
| 159          | UZB                 | Uzbekistan            | Central and Southern Asia        | 0.47       | -0.58      | 1.15       |
| 160          | VEN                 | Venezuela, RB         | Latin America and the Caribbean  | -1.51      | -0.06      | 1.41       |
| 161          | VNM                 | Vietnam               | Eastern and Southeastern Asia    | 1.02       | -0.54      | 0.84       |
| 162          | VUT                 | Vanuatu               | Oceania                          | -1.37      | -0.60      | -0.64      |
| 163          | YEM                 | Yemen, Rep.           | Northern Africa and Western Asia | -5.96      | -1.74      | -0.78      |
| 164          | ZAF                 | South Africa          | Sub-Saharan Africa               | -0.73      | -1.15      | 1.91       |
| 165          | ZMB                 | Zambia                | Sub-Saharan Africa               | -3.85      | -0.03      | 1.16       |
| 166          | ZWE                 | Zimbabwe              | Sub-Saharan Africa               | -2.75      | 1.04       | 0.58       |

**Table S2 List of SDG indicators used in *Sustainable Development Report 2020*.** More details are available from the *Sustainable Development Report* (<https://www.sustainabledevelopment.report/>).

| <b>Indicator</b> | <b>Indicator description</b>                                                                                                               |
|------------------|--------------------------------------------------------------------------------------------------------------------------------------------|
| sdg1_wpc         | Poverty headcount ratio at \$1.90/day (%)                                                                                                  |
| sdg1_320pov      | Poverty headcount ratio at \$3.20/day (%)                                                                                                  |
| sdg1_oeudpov     | Poverty rate after taxes and transfers (%)                                                                                                 |
| sdg2_undernsh    | Prevalence of undernourishment (%)                                                                                                         |
| sdg2_stunting    | Prevalence of stunting in children under 5 years of age (%)                                                                                |
| sdg2_wasting     | Prevalence of wasting in children under 5 years of age (%)                                                                                 |
| sdg2_obesity     | Prevalence of obesity, BMI $\geq$ 30 (% of adult population)                                                                               |
| sdg2_trophic     | Human Trophic Level (best 2-3 worst)                                                                                                       |
| sdg2_crlyld      | Cereal yield (tonnes per hectare of harvested land)                                                                                        |
| sdg2_snmi        | Sustainable Nitrogen Management Index (best 0-1.41 worst)                                                                                  |
| sdg2_yieldgap    | Yield gap closure (% of potential yield)                                                                                                   |
| sdg3_matmort     | Maternal mortality rate (per 100,000 live births)                                                                                          |
| sdg3_neonat      | Neonatal mortality rate (per 1,000 live births)                                                                                            |
| sdg3_u5mort      | Mortality rate, under-5 (per 1,000 live births)                                                                                            |
| sdg3_tb          | Incidence of tuberculosis (per 100,000 population)                                                                                         |
| sdg3_hiv         | New HIV infections (per 1,000 uninfected population)                                                                                       |
| sdg3_ncds        | Age-standardized death rate due to cardiovascular disease, cancer, diabetes, or chronic respiratory disease in adults aged 30–70 years (%) |
| sdg3_pollmort    | Age-standardized death rate attributable to household air pollution and ambient air pollution (per 100,000 population)                     |
| sdg3_traffic     | Traffic deaths (per 100,000 population)                                                                                                    |
| sdg3_lifec       | Life expectancy at birth (years)                                                                                                           |
| sdg3_fertility   | Adolescent fertility rate (births per 1,000 adolescent females aged 15 to 19)                                                              |
| sdg3_births      | Births attended by skilled health personnel (%)                                                                                            |
| sdg3_vac         | Percentage of surviving infants who received 2 WHO-recommended vaccines (%)                                                                |
| sdg3_uhc         | Universal health coverage (UHC) index of service coverage (worst 0-100 best)                                                               |
| sdg3_swb         | Subjective well-being (average ladder score, worst 0-10 best)                                                                              |
| sdg3_region      | Gap in life expectancy at birth among regions (years)                                                                                      |
| sdg3_incomeeg    | Gap in self-reported health status by income (percentage points)                                                                           |
| sdg3_smoke       | Daily smokers (% of population aged 15 and over)                                                                                           |
| sdg4_primary     | Net primary enrollment rate (%)                                                                                                            |
| sdg4_second      | Lower secondary completion rate (%)                                                                                                        |
| sdg4_literacy    | Literacy rate (% of population aged 15 to 24)                                                                                              |
| sdg4_earlyedu    | Participation rate in pre-primary organized learning (% of children aged 4 to 6)                                                           |
| sdg4_tertiary    | Tertiary educational attainment (% of population aged 25 to 34)                                                                            |
| sdg4_pisa        | PISA score (worst 0-600 best)                                                                                                              |
| sdg4_socioec     | Variation in science performance explained by socio-economic status (%)                                                                    |
| sdg4_science     | Underachievers in science (% of 15-year-olds)                                                                                              |
| sdg4_resil       | Resilient students in science (% of 15-year-olds)                                                                                          |
| sdg5_familypl    | Demand for family planning satisfied by modern methods (% of females aged 15 to 49 who are married or in unions)                           |

| <b>Indicator</b> | <b>Indicator description</b>                                                                                                              |
|------------------|-------------------------------------------------------------------------------------------------------------------------------------------|
| sdg5_edat        | Ratio of female-to-male mean years of education received (%)                                                                              |
| sdg5_lfpr        | Ratio of female-to-male labor force participation rate (%)                                                                                |
| sdg5_parl        | Seats held by women in national parliament (%)                                                                                            |
| sdg5_paygap      | Gender wage gap (% of male median wage)                                                                                                   |
| sdg5_unpaid      | Gender gap in time spent doing unpaid work (minutes/day)                                                                                  |
| sdg6_water       | Population using at least basic drinking water services (%)                                                                               |
| sdg6_sanita      | Population using at least basic sanitation services (%)                                                                                   |
| sdg6_freshwat    | Freshwater withdrawal (% of available freshwater resources)                                                                               |
| sdg6_wastewat    | Anthropogenic wastewater that receives treatment (%)                                                                                      |
| sdg6_scarcew     | Scarce water consumption embodied in imports (m <sup>3</sup> /capita)                                                                     |
| sdg6_safewat     | Population using safely managed water services (%)                                                                                        |
| sdg6_safesan     | Population using safely managed sanitation services (%)                                                                                   |
| sdg7_elecac      | Population with access to electricity (%)                                                                                                 |
| sdg7_cleanfuel   | Population with access to clean fuels and technology for cooking (%)                                                                      |
| sdg7_co2twh      | CO <sub>2</sub> emissions from fuel combustion for electricity and heating per total electricity output (MtCO <sub>2</sub> /TWh)          |
| sdg7_ren         | Share of renewable energy in total primary energy supply (%)                                                                              |
| sdg8_impacc      | Fatal work-related accidents embodied in imports (per 100,000 population)                                                                 |
| sdg8_adjgrowth   | Adjusted GDP growth (%)                                                                                                                   |
| sdg8_slavery     | Victims of modern slavery (per 1,000 population)                                                                                          |
| sdg8_accounts    | Adults with an account at a bank or other financial institution or with a mobile-money-service provider (% of population aged 15 or over) |
| sdg8_unemp       | Unemployment rate (% of total labor force)                                                                                                |
| sdg8_empop       | Employment-to-population ratio (%)                                                                                                        |
| sdg8_yneet       | Youth not in employment, education or training (NEET) (% of population aged 15 to 29)                                                     |
| sdg9_intuse      | Population using the internet (%)                                                                                                         |
| sdg9_mobuse      | Mobile broadband subscriptions (per 100 population)                                                                                       |
| sdg9_lpi         | Logistics Performance Index: Quality of trade and transport-related infrastructure (worst 1-5 best)                                       |
| sdg9_qs          | The Times Higher Education Universities Ranking: Average score of top 3 universities (worst 0-100 best)                                   |
| sdg9_articles    | Scientific and technical journal articles (per 1,000 population)                                                                          |
| sdg9_rdex        | Expenditure on research and development (% of GDP)                                                                                        |
| sdg9_rdes        | Researchers (per 1,000 employed population)                                                                                               |
| sdg9_patents     | Triadic patent families filed (per million population)                                                                                    |
| sdg9_netacc      | Gap in internet access by income (percentage points)                                                                                      |
| sdg9_womensci    | Women in science and engineering (% of tertiary graduates in science and engineering)                                                     |
| sdg10_adjgini    | Gini coefficient adjusted for top income                                                                                                  |
| sdg10_palma      | Palma ratio                                                                                                                               |
| sdg10_elder      | Elderly poverty rate (% of population aged 66 or over)                                                                                    |
| sdg11_pm25       | Annual mean concentration of particulate matter of less than 2.5 microns in diameter (PM2.5) (µg/m <sup>3</sup> )                         |
| sdg11_pipedwat   | Access to improved water source, piped (% of urban population)                                                                            |
| sdg11_transport  | Satisfaction with public transport (%)                                                                                                    |
| sdg11_rentover   | Population with rent overburden (%)                                                                                                       |



| <b>Indicator</b> | <b>Indicator description</b>                                                                                                                |
|------------------|---------------------------------------------------------------------------------------------------------------------------------------------|
| sdg12_msw        | Municipal solid waste (kg/capita/day)                                                                                                       |
| sdg12_ewaste     | Electronic waste (kg/capita)                                                                                                                |
| sdg12_so2prod    | Production-based SO <sub>2</sub> emissions (kg/capita)                                                                                      |
| sdg12_so2import  | SO <sub>2</sub> emissions embodied in imports (kg/capita)                                                                                   |
| sdg12_prodnitro  | Production-based nitrogen emissions (kg/capita)                                                                                             |
| sdg12_reacnitro  | Nitrogen emissions embodied in imports (kg/capita)                                                                                          |
| sdg12_mswrecycl  | Non-recycled municipal solid waste (kg/capita/day)                                                                                          |
| sdg13_co2pc      | Energy-related CO <sub>2</sub> emissions (tCO <sub>2</sub> /capita)                                                                         |
| sdg13_co2import  | CO <sub>2</sub> emissions embodied in imports (tCO <sub>2</sub> /capita)                                                                    |
| sdg13_co2export  | CO <sub>2</sub> emissions embodied in fossil fuel exports (kg/capita)                                                                       |
| sdg13_ecr        | Effective carbon rate (EUR/tCO <sub>2</sub> )                                                                                               |
| sdg14_cpma       | Mean area that is protected in marine sites important to biodiversity (%)                                                                   |
| sdg14_cleanwat   | Ocean Health Index: Clean Waters score (worst 0-100 best)                                                                                   |
| sdg14_fishstocks | Fish caught from overexploited or collapsed stocks (% of total catch)                                                                       |
| sdg14_trawl      | Fish caught by trawling (%)                                                                                                                 |
| sdg14_biomar     | Marine biodiversity threats embodied in imports (per million population)                                                                    |
| sdg15_cpma       | Mean area that is protected in terrestrial sites important to biodiversity (%)                                                              |
| sdg15_cpfa       | Mean area that is protected in freshwater sites important to biodiversity (%)                                                               |
| sdg15_redlist    | Red List Index of species survival (worst 0-1 best)                                                                                         |
| sdg15_forchg     | Permanent deforestation (% of forest area, 5-year average)                                                                                  |
| sdg15_biofrwtr   | Terrestrial and freshwater biodiversity threats embodied in imports (per million population)                                                |
| sdg16_weaponsexp | Exports of major conventional weapons (TIV constant million USD per 100,000 population)                                                     |
| sdg16_homicides  | Homicides (per 100,000 population)                                                                                                          |
| sdg16_detain     | Unsentenced detainees (% of prison population)                                                                                              |
| sdg16_safe       | Percentage of population who feel safe walking alone at night in the city or area where they live (%)                                       |
| sdg16_prs        | Property Rights (worst 1-7 best)                                                                                                            |
| sdg16_u5reg      | Birth registrations with civil authority (% of children under age 5)                                                                        |
| sdg16_cpi        | Corruption Perception Index (worst 0-100 best)                                                                                              |
| sdg16_clabor     | Children involved in child labor (% of population aged 5 to 14)                                                                             |
| sdg16_rsf        | Press Freedom Index (best 0-100 worst)                                                                                                      |
| sdg16_prison     | Persons held in prison (per 100,000 population)                                                                                             |
| sdg17_oda        | For high-income and all OECD DAC countries: International concessional public finance, including official development assistance (% of GNI) |
| sdg17_cohaven    | Corporate Tax Haven Score (best 0-100 worst)                                                                                                |
| sdg17_govex      | Government spending on health and education (% of GDP)                                                                                      |
| sdg17_govrev     | Other countries: Government revenue excluding grants (% of GDP)                                                                             |

**Table S3 List of United Nations' official SDG indicators used in this study.** More details are available from the SDG Global Database of the United Nations (<https://unstats.un.org/sdgs/dataportal>).

| Indicator           | Series code      | Series description                                                                                                                                                                                             |
|---------------------|------------------|----------------------------------------------------------------------------------------------------------------------------------------------------------------------------------------------------------------|
| 1.3.1               | SI_COV_BENFTS    | Proportion of population covered by at least one social protection benefit (%)                                                                                                                                 |
| 1.4.1               | SP_ACS_BSRVH2O   | Proportion of population using basic drinking water services (%)                                                                                                                                               |
| 1.4.1*              | SP_ACS_BSRVSAN   | Proportion of population using basic sanitation services (%)                                                                                                                                                   |
| 1.5.1/11.5.1/13.1.1 | VC_DSR_DAFF      | Number of directly affected persons attributed to disasters per 100,000 population (number)                                                                                                                    |
| 1.5.1/11.5.1/13.1.1 | VC_DSR_MTMP      | Number of deaths and missing persons attributed to disasters per 100,000 population (number)                                                                                                                   |
| 1.a.2               | SD_XPD_ESED      | Proportion of total government spending on essential services, education (%)                                                                                                                                   |
| 2.1.1               | SN_ITK_DEFC      | Prevalence of undernourishment (%)                                                                                                                                                                             |
| 2.2.1               | SH_STA_STNT      | Prevalence of stunting in children under 5 years of age (%)                                                                                                                                                    |
| 2.2.2               | SH_STA_WAST      | Prevalence of wasting in children under 5 years of age (%)                                                                                                                                                     |
| 2.2.3               | SH_STA_ANEM_NPRG | Proportion of women aged 15-49 years with anaemia, non-pregnant (%)                                                                                                                                            |
| 2.2.3               | SH_STA_ANEM_PREG | Proportion of women aged 15-49 years with anaemia, pregnant (%)                                                                                                                                                |
| 2.c.1               | AG_FPA_CFPI      | Indicator of Food Price Anomalies (IFPA), by Consumer Food Price Index                                                                                                                                         |
| 3.1.1               | SH_STA_MORT      | Maternal mortality ratio                                                                                                                                                                                       |
| 3.1.2               | SH_STA_BRTC      | Proportion of births attended by skilled health personnel (%)                                                                                                                                                  |
| 3.2.1               | SH_DYN_MORT      | Under-five mortality rate (deaths per 1,000 live births)                                                                                                                                                       |
| 3.2.2               | SH_DYN_NMRT      | Neonatal mortality rate (deaths per 1,000 live births)                                                                                                                                                         |
| 3.3.2               | SH_TBS_INCD      | Tuberculosis incidence (per 100,000 population)                                                                                                                                                                |
| 3.3.4               | SH_HAP_HBSAG     | Prevalence of hepatitis B surface antigen (HBsAg) (%)                                                                                                                                                          |
| 3.4.1               | SH_DTH_NCOM      | Mortality rate attributed to cardiovascular disease, cancer, diabetes or chronic respiratory disease (probability)                                                                                             |
| 3.4.2               | SH_STA_SCIDE     | Suicide mortality rate (deaths per 100,000 population)                                                                                                                                                         |
| 3.5.1               | SH_SUD_ALCOL     | Alcohol use disorders, 12-month prevalence (%)                                                                                                                                                                 |
| 3.5.2               | SH_ALC_CONSPT    | Alcohol consumption per capita (aged 15 years and older) within a calendar year (litres of pure alcohol)                                                                                                       |
| 3.6.1               | SH_STA_TRAF      | Death rate due to road traffic injuries (per 100,000 population)                                                                                                                                               |
| 3.7.2               | SP_DYN_ADKL      | Adolescent birth rate (per 1,000 women aged 15-19 and 10-14 years)                                                                                                                                             |
| 3.7.2               | SP_DYN_ADKL      | Adolescent birth rate (per 1,000 women aged 15-19 and 10-14 years)                                                                                                                                             |
| 3.8.1               | SH_ACS_UNHC      | Universal health coverage (UHC) service coverage index                                                                                                                                                         |
| 3.9.1               | SH_STA_ASAIRP    | Age-standardized mortality rate attributed to household and ambient air pollution (deaths per 100,000 population)                                                                                              |
| 3.9.2               | SH_STA_WASHARI   | Mortality rate attributed to unsafe water, unsafe sanitation and lack of hygiene from diarrhoea, intestinal nematode infections, malnutrition and acute respiratory infections (deaths per 100,000 population) |
| 3.9.3               | SH_STA_POISN     | Mortality rate attributed to unintentional poisonings (deaths per 100,000 population)                                                                                                                          |
| 3.a.1               | SH_PRV_SMOK      | Age-standardized prevalence of current tobacco use among persons aged 15 years and older (%)                                                                                                                   |
| 3.b.1               | SH_ACS           | Average proportion of the target population with access to 3 doses of diphtheria-tetanus-pertussis (DTP3), measles-containing-vaccine second-dose (MCV2), and pneumococcal conjugate 3rd dose (PCV3) (%)       |
| 3.c.1               | SH_MED_DEN       | Health worker density (per 10,000 population)                                                                                                                                                                  |
| 3.d.1               | SH_IHR_CAPS      | International Health Regulations (IHR) capacity (%)                                                                                                                                                            |

| Indicator    | Series code    | Series description                                                                                                                                                                           |
|--------------|----------------|----------------------------------------------------------------------------------------------------------------------------------------------------------------------------------------------|
| 4.2.2        | SE_PRE_PARTN   | Participation rate in organized learning (one year before the official primary entry age) (%)                                                                                                |
| 4.5.1        | SE_GPI_PTNPRE  | Adjusted gender parity index for participation rate in organized learning (one year before the official primary entry age), (ratio)                                                          |
| 4.a.1        | SE_ACC_ALL     | Proportion of schools with basic facilities                                                                                                                                                  |
| 5.2.1        | VC_VAW_MARR    | Proportion of ever-partnered women and girls subjected to physical and/or sexual violence by a current or former intimate partner in the previous 12 months (%)                              |
| 5.5.1        | SG_GEN_PARL    | Proportion of seats held by women in national parliaments (% of total number of seats)                                                                                                       |
| 5.5.2        | IC_GEN_MGTL    | Proportion of women in managerial positions (%)                                                                                                                                              |
| 6.2.1        | SH_SAN_DEFECT  | Proportion of population practicing open defecation (%)                                                                                                                                      |
| 6.4.1        | ER_H2O_WUEYST  | Water Use Efficiency (United States dollars per cubic meter)                                                                                                                                 |
| 6.4.2        | ER_H2O_STRESS  | Level of water stress: freshwater withdrawal as a proportion of available freshwater resources (%)                                                                                           |
| 6.5.1        | ER_H2O_IWRMD   | Degree of integrated water resources management implementation (%)                                                                                                                           |
| 6.6.1        | EN_LKRV_PWAC   | Lakes and rivers permanent water area change (%)                                                                                                                                             |
| 6.6.1        | EN_LKRV_SWAC   | Lakes and rivers seasonal water area change (%)                                                                                                                                              |
| 6.6.1        | EN_RSRV_MNWAP  | Reservoir minimum water area (% of total land area)                                                                                                                                          |
| 6.6.1        | EN_RSRV_MXWAP  | Reservoir maximum water area (% of total land area)                                                                                                                                          |
| 6.6.1        | EN_WBE_WTLP    | Wetlands area (% of total land area)                                                                                                                                                         |
| 7.1.1        | EG_ACS_ELEC    | Proportion of population with access to electricity, by urban/rural (%)                                                                                                                      |
| 7.1.2        | EG_EGY_CLEAN   | Proportion of population with primary reliance on clean fuels and technology (%)                                                                                                             |
| 7.2.1        | EG_FEC_RNEW    | Renewable energy share in the total final energy consumption (%)                                                                                                                             |
| 7.3.1        | EG_EGY_PRIM    | Energy intensity level of primary energy (megajoules per constant 2017 purchasing power parity GDP)                                                                                          |
| 7.b.1/12.a.1 | EG_EGY_RNEW    | Installed renewable electricity-generating capacity (watts per capita)                                                                                                                       |
| 8.1.1        | NY_GDP_PCAP    | Annual growth rate of real GDP per capita (%)                                                                                                                                                |
| 8.2.1        | SL_EMP_PCAP    | Annual growth rate of real GDP per employed person (%)                                                                                                                                       |
| 8.4.2/12.2.2 | EN_MAT_DOMCMPC | Domestic material consumption per capita (tonnes)                                                                                                                                            |
| 8.4.2/12.2.2 | EN_MAT_DOMCMPG | Domestic material consumption per unit of GDP (kilograms per constant 2015 United States dollars)                                                                                            |
| 8.5.2        | SL_TLF_UEM     | Unemployment rate (%)                                                                                                                                                                        |
| 8.6.1        | SL_TLF_NEET    | Proportion of youth not in education, employment or training (%)                                                                                                                             |
| 8.8.2        | SL_LBR_NTLCLPL | Level of national compliance with labour rights (freedom of association and collective bargaining) based on International Labour Organization (ILO) textual sources and national legislation |
| 8.10.1       | FB_ATM_TOTL    | Number of automated teller machines (ATMs) per 100,000 adults                                                                                                                                |
| 8.10.1       | FB_CBK_BRCH    | Number of commercial bank branches per 100,000 adults                                                                                                                                        |
| 8.10.2       | FB_BNK_ACCSS   | Proportion of adults (15 years and older) with an account at a financial institution or mobile-money-service provider (% of adults aged 15 years and older)                                  |
| 9.1.2        | IS_RDP_FRGVOL  | Freight volume (tonne kilometres)                                                                                                                                                            |
| 9.1.2        | IS_RDP_PFVOL   | Passenger volume (passenger kilometres)                                                                                                                                                      |
| 9.2.1        | NV_IND_MANF    | Manufacturing value added (constant 2015 United States dollars) as a proportion of GDP (%)                                                                                                   |
| 9.2.1        | NV_IND_MANFPC  | Manufacturing value added per capita (constant 2015 United States dollars)                                                                                                                   |
| 9.2.2        | SL_TLF_MANF    | Manufacturing employment as a proportion of total employment (%)                                                                                                                             |

| <b>Indicator</b> | <b>Series code</b> | <b>Series description</b>                                                                                                                                                                                                                 |
|------------------|--------------------|-------------------------------------------------------------------------------------------------------------------------------------------------------------------------------------------------------------------------------------------|
| 9.4.1            | EN_ATM_CO2GDP      | Carbon dioxide emissions per unit of GDP PPP (kilogrammes of CO2 per constant 2017 United States dollars)                                                                                                                                 |
| 9.4.1*           | EN_ATM_CO2MVA      | Carbon dioxide emissions per unit of manufacturing value added (kilogrammes of CO2 per constant 2015 United States dollars)                                                                                                               |
| 9.b.1            | NV_IND_TECH        | Proportion of medium and high-tech manufacturing value added in total value added (%)                                                                                                                                                     |
| 9.c.1            | IT_MOB_4GNTWK      | Proportion of population covered by at least a 4G mobile network (%)                                                                                                                                                                      |
| 10.4.1           | SL_EMP_GTOTL       | Labour share of GDP (%)                                                                                                                                                                                                                   |
| 10.7.4           | SM_POP_REFG_OR     | Number of refugees per 100,000 population, by country of origin (per 100,000 population)                                                                                                                                                  |
| 10.a.1           | TM_TRF_ZERO        | Proportion of tariff lines applied to imports with zero-tariff (%)                                                                                                                                                                        |
| 11.1.1           | EN_LND_SLUM        | Proportion of urban population living in slums (%)                                                                                                                                                                                        |
| 11.5.3           | VC_DSR_BSDN        | Number of disruptions to basic services attributed to disasters (number)                                                                                                                                                                  |
| 11.6.2           | EN_ATM_PM25        | Annual mean levels of fine particulate matter (population-weighted) (micrograms per cubic meter)                                                                                                                                          |
| 11.a.1           | SD_CPA_UPRDP       | Countries that have national urban policies or regional development plans that respond to population dynamics; ensure balanced territorial development; and increase local fiscal space (1 = YES; 0 = NO)                                 |
| 12.3.1           | AG_FOOD_WST_PC     | Food waste per capita (KG)                                                                                                                                                                                                                |
| 12.4.1           | SG_HAZ             | Average ratio of parties meeting their commitments and obligations in transmitting information as required by Basel Convention, Montreal Protocol, Rotterdam Convention, and Stockholm Convention on hazardous waste, and other chemicals |
| 12.4.2           | EN_EWT_GENPCAP     | Electronic waste (kg/capita)                                                                                                                                                                                                              |
| 12.4.2           | EN_MWT_COLLV       | Municipal solid waste (kg/capita/day)                                                                                                                                                                                                     |
| 12.b.1           | ST_EEV_STDACCT     | Implementation of standard accounting tools to monitor the economic and environmental aspects of tourism (number of tables)                                                                                                               |
| 12.c.1           | ER_FFS_CMPT_GDP    | Fossil-fuel subsidies (consumption and production) as a proportion of total GDP (%)                                                                                                                                                       |
| 12.c.1           | ER_FFS_CMPT_PC_CD  | Fossil-fuel subsidies (consumption and production) per capita (nominal United States dollars)                                                                                                                                             |
| 14.1.1           | EN_MAR_CHLANM      | Chlorophyll-a anomaly, remote sensing (%)                                                                                                                                                                                                 |
| 14.5.1           | ER_MRN_MPA         | Average proportion of Marine Key Biodiversity Areas (KBAs) covered by protected areas (%)                                                                                                                                                 |
| 15.1.1           | AG_LND_FRST        | Forest area as a proportion of total land area (%)                                                                                                                                                                                        |
| 15.1.2           | ER_PTD_FRHWTR      | Average proportion of Freshwater Key Biodiversity Areas (KBAs) covered by protected areas (%)                                                                                                                                             |
| 15.1.2*          | ER_PTD_TERR        | Average proportion of Terrestrial Key Biodiversity Areas (KBAs) covered by protected areas (%)                                                                                                                                            |
| 15.2.1           | AG_LND_FRSTBIOPHA  | Above-ground biomass in forest (tonnes per hectare)                                                                                                                                                                                       |
| 15.2.1           | AG_LND_FRSTCHG     | Annual forest area change rate (%)                                                                                                                                                                                                        |
| 15.2.1           | AG_LND_FRSTPRCT    | Proportion of forest area within legally established protected areas (%)                                                                                                                                                                  |
| 15.4.1           | ER_PTD_MTN         | Average proportion of Mountain Key Biodiversity Areas (KBAs) covered by protected areas (%)                                                                                                                                               |
| 15.4.2           | ER_MTN_GRNCVI      | Mountain Green Cover Index                                                                                                                                                                                                                |
| 15.5.1           | ER_RSK_LST         | Red List Index                                                                                                                                                                                                                            |
| 15.6.1           | ER_CBD_SMTA        | Total reported number of Standard Material Transfer Agreements (SMTAs) transferring plant genetic resources for food and agriculture to the country (number)                                                                              |
| 15.8.1           | ER_IAS_LEGIS       | Legislation, Regulation, Act related to the prevention of introduction and management of Invasive Alien Species (1 = YES, 0 = NO)                                                                                                         |

| <b>Indicator</b> | <b>Series code</b>   | <b>Series description</b>                                                                                                                                                          |
|------------------|----------------------|------------------------------------------------------------------------------------------------------------------------------------------------------------------------------------|
| 15.8.1           | ER_IAS_NBSAP         | National Biodiversity Strategy and Action Plan (NBSAP) targets alignment to Aichi Biodiversity target 9 set out in the Strategic Plan for Biodiversity 2011-2020 (1 = YES, 0 = NO) |
| 16.1.1           | VC_IHR_PSRC          | Number of victims of intentional homicide per 100,000 population (victims per 100,000 population)                                                                                  |
| 16.3.2           | VC_PRS_UNSENT        | Unsentenced detainees as a proportion of overall prison population (%)                                                                                                             |
| 17.1.1           | GR_G14_GDP           | Total government revenue (budgetary central government) as a proportion of GDP (%)                                                                                                 |
| 17.1.2           | GC_GOB_TAXD          | Proportion of domestic budget funded by domestic taxes (% of GDP)                                                                                                                  |
| 17.6.1           | IT_NET_BBND          | Fixed Internet broadband subscriptions per 100 inhabitants (per 100 inhabitants)                                                                                                   |
| 17.8.1           | IT_USE_ii99          | Internet users per 100 inhabitants                                                                                                                                                 |
| 17.10.1          | TM_TAX_WMFN          | Worldwide weighted tariff-average, most-favoured-nation status (%)                                                                                                                 |
| 17.12.1          | TM_TAX_DMFN          | Average tariff applied by developed countries, most-favored nation status (%)                                                                                                      |
| 17.13.1          | BN_CAB_XOKA_GD_ZS    | Current account balance as a proportion of GDP (%)                                                                                                                                 |
| 17.13.1          | BX_KLT_DINV_WD_GD_ZS | Foreign direct investment, net inflows, as a proportion of GDP (%)                                                                                                                 |
| 17.13.1          | FI_RES_TOTL_MO       | Total reserves in months of imports (ratio)                                                                                                                                        |
| 17.13.1          | FM_LBL_BMNY_IR_ZS    | Broad money to total reserves ratio                                                                                                                                                |
| 17.13.1          | FP_CPI_TOTL_ZG       | Annual inflation, consumer prices (%)                                                                                                                                              |
| 17.13.1          | GC_BAL_CASH_GD_ZS    | Cash surplus/deficit as a proportion of GDP (%)                                                                                                                                    |
| 17.13.1          | NE_CON_GOVT_KD_ZG    | Annual growth of the general government final consumption expenditure (%)                                                                                                          |
| 17.13.1          | NE_CON_PRVT_KD_ZG    | Annual growth of households and NPISHs final consumption expenditure (%)                                                                                                           |
| 17.13.1          | NE_EXP_GNFS_KD_ZG    | Annual growth of exports of goods and services (%)                                                                                                                                 |
| 17.13.1          | NE_GDI_TOTL_KD_ZG    | Annual growth of the gross capital formation (%)                                                                                                                                   |
| 17.13.1          | NE_IMP_GNFS_KD_ZG    | Annual growth of imports of goods and services (%)                                                                                                                                 |
| 17.13.1          | NY_GDP_MKTP_KD_ZG    | Annual GDP growth (%)                                                                                                                                                              |
| 17.13.1          | TG_VAL_TOTL_GD_ZS    | Merchandise trade as a proportion of GDP (%)                                                                                                                                       |
| 17.18.2          | SG_STT_FPOS          | Countries with national statistical legislation exists that complies with the Fundamental Principles of Official Statistics (1 = YES; 0 = NO)                                      |
| 17.18.3          | SG_STT_NSDSIMPL      | Countries with national statistical plans that are under implementation (1 = YES; 0 = NO)                                                                                          |
| 17.19.2          | SG_REG_BRTH90N       | Countries with birth registration data that are at least 90 percent complete (1 = YES; 0 = NO)                                                                                     |
| 17.19.2          | SG_REG_DETH75N       | Countries with death registration data that are at least 75 percent complete (1 = YES; 0 = NO)                                                                                     |
